# Supplementary material for: Human hair-derived nitrogen and sulfur co-doped porous carbon materials for gas adsorption
Source: Royal Society of Chemistry journal article supplement (doi:10.1039/c5ra15690d), 2015-01-01
Supplement: c5ra15690d1.pdf [file c5ra15690d1.pdf]

**Electronic supplementary information for**

**Human hair-derived nitrogen and sulfur co-  
doped porous carbon materials for gas  
adsorption**

Zhi-Qiang Zhao,<sup>a,b</sup> Pei-Wen Xiao,<sup>a</sup> Li Zhao,<sup>\*,a</sup> Yuwen Liu,<sup>\*,b</sup>

Bao-Hang Han<sup>\*,a</sup>

*<sup>a</sup> National Center for Nanoscience and Technology, Beijing 100190, China*

*<sup>b</sup> College of Environment and Chemical Engineering, Yanshan University,*

*Qinhuangdao 066004, China*

Tel: +86 10 8254 5576. Email: [hanbh@nanoctr.cn](mailto:hanbh@nanoctr.cn)

Tel: +86 10 8254 5708. Email: [zhaol@nanoctr.cn](mailto:zhaol@nanoctr.cn)

Tel: +86 335 8061 569. Email: [liuyuwen@ysu.edu.cn](mailto:liuyuwen@ysu.edu.cn)

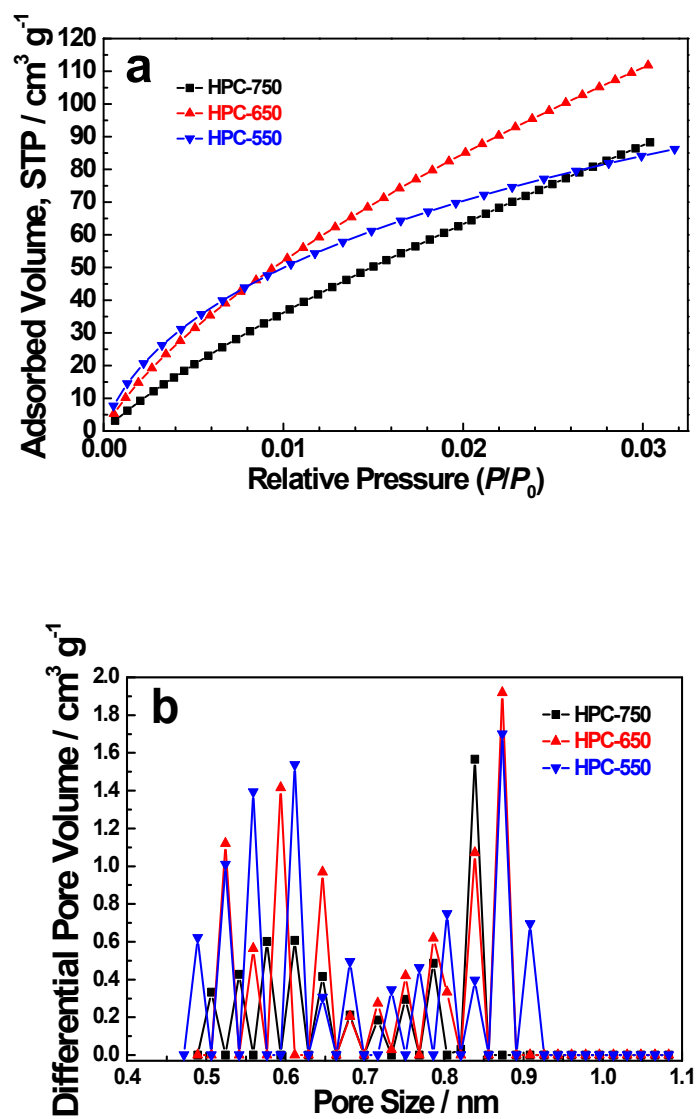

**Fig. S1.** Carbon dioxide adsorption isotherms (a) and the DFT pore size distribution profiles (b) of HPC-*x* materials.

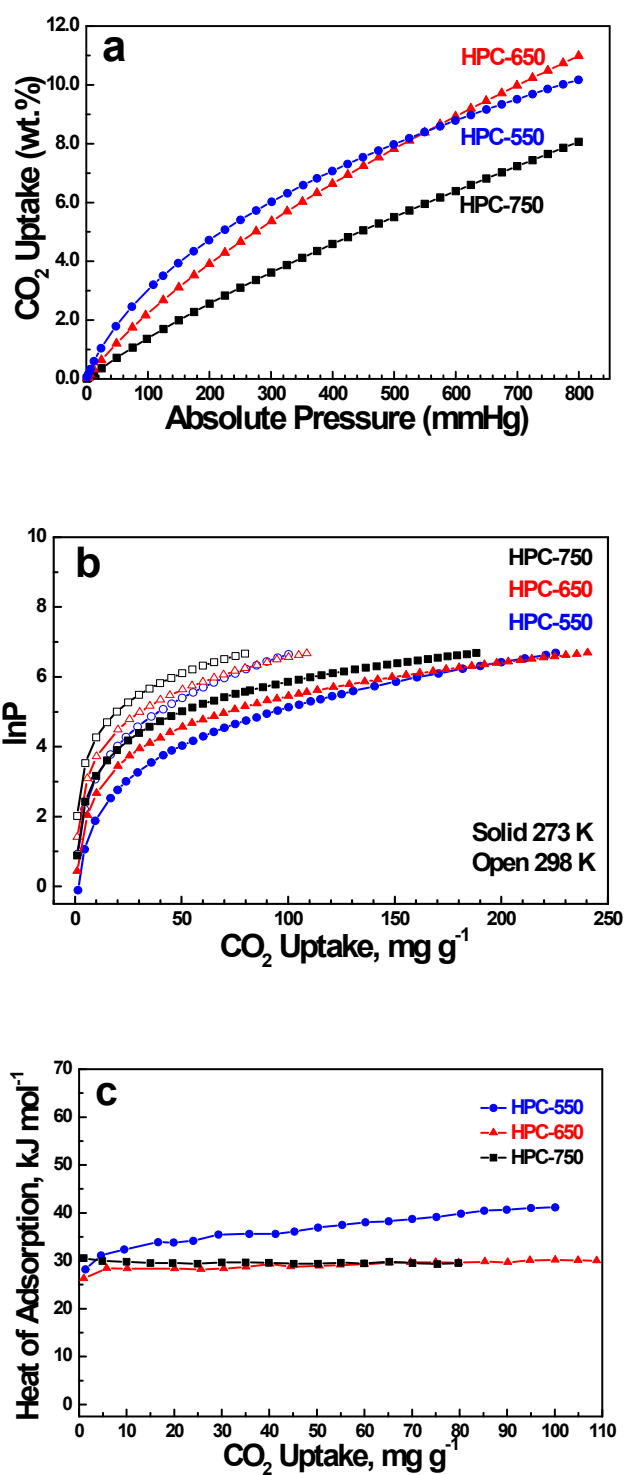

**Fig. S2.** (a) CO<sub>2</sub> adsorption isotherms of HPC-750 (square), HPC-650 (up triangle), and HPC-550 (circle) at different temperatures (273 and 298 K), (b) Virial analysis of CO<sub>2</sub> adsorption data (273 and 298 K) and (c) isosteric heat of CO<sub>2</sub> adsorption.

The binding energies of CO<sub>2</sub> in HPC-*x* are reflected in the isosteric heat of

adsorption,  $Q_{st}$ , defined as

$$Q_{st} = RT^2 \left( \frac{\partial \ln P}{\partial T} \right)_q \quad (1)$$

These values were determined using the pure component isotherm fits. Fig. S1 presents data on the loading dependence of  $Q_{st}$  in HPC-*x*.

**Table S1.** The CO<sub>2</sub> adsorption capacities at different temperatures (at 1.0 bar) and CO<sub>2</sub> adsorption heat of the HPC-*x* materials.

| Sample  | CO <sub>2</sub> (wt %) <sup>a</sup><br>273 K | CO <sub>2</sub> (wt %) <sup>b</sup><br>298 K | CO <sub>2</sub> adsorption<br>heat (kJ mol <sup>-1</sup> ) <sup>c</sup> |
|---------|----------------------------------------------|----------------------------------------------|-------------------------------------------------------------------------|
| HPC-550 | 18.8                                         | 8.1                                          | 28.6~41.3                                                               |
| HPC-650 | 24.0                                         | 11.0                                         | 26.5~30.4                                                               |
| HPC-750 | 22.6                                         | 10.2                                         | 29.7~30.7                                                               |

<sup>a</sup> CO<sub>2</sub> gravimetric uptake capacities at 273 K and 1.0 bar. <sup>b</sup> CO<sub>2</sub> gravimetric uptake capacities at 298 K and 1.0 bar. <sup>c</sup> CO<sub>2</sub> adsorption heat is based on the Clausius–Clapeyron equation.
